# Supplementary material for: Local adaptation through genetic differentiation in highly fragmented Tilia cordata populations
Source: PubMed Central journal article supplement (PMC6024143; doi:10.1002/ece3.4131), 2018-05-07

### Principal Coordinates (PCoA)

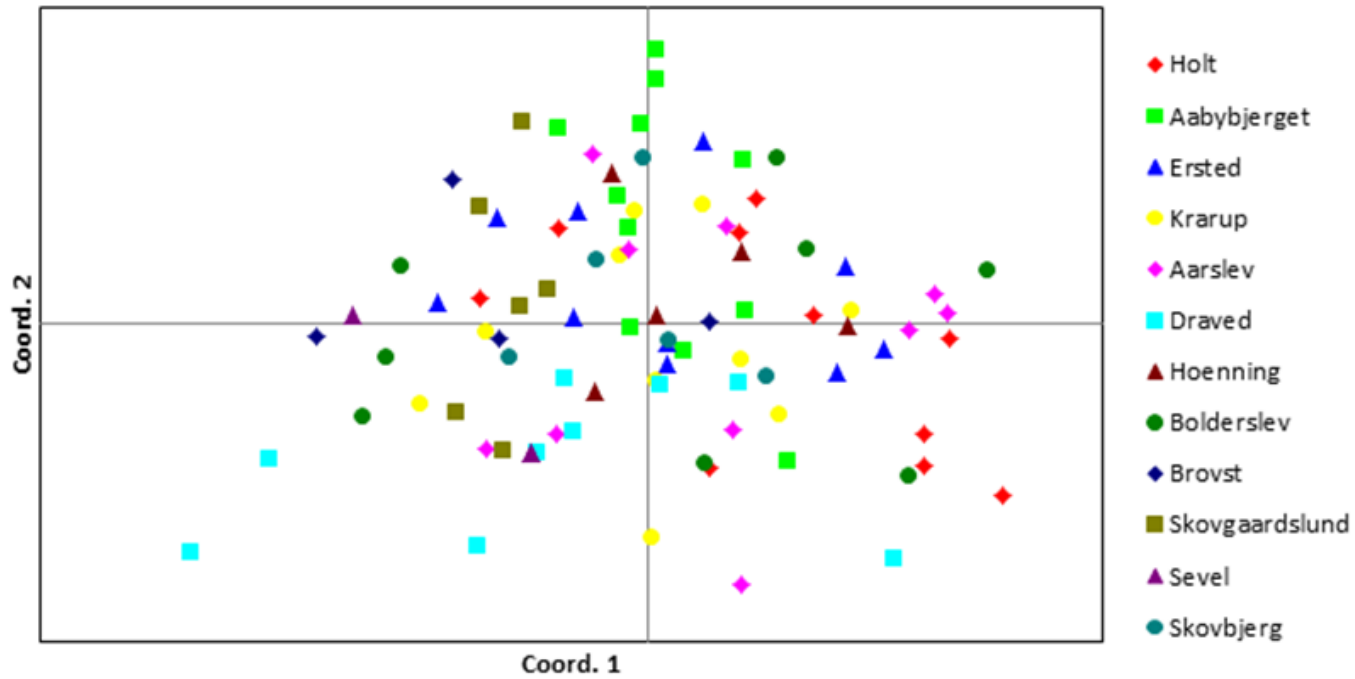

Supplement: ECE3-8-5968-s001.pdf [file ECE3-8-5968-s001.pdf]
